# Supplementary material for: La productividad del suelo y el paradigma del trigo
Source: MDPI journal article supplement (doi:10.3390/toxins13070472), 1995-01-01
Supplement: s1 [file s1]

# Supplementary Materials: Association of Sarcopenia and Gut Microbiota Composition in Older Patients with Advanced Chronic Kidney Disease, Investigation of the Interactions with Uremic Toxins, Inflammation and Oxidative Stress

Elisabetta Margiotta, Lara Caldiroli, Maria Luisa Callegari, Francesco Miragoli, Francesca Zanoni, Silvia Armelloni, Vittoria Rizzo, Piergiorgio Messa and Simone Vettoretti

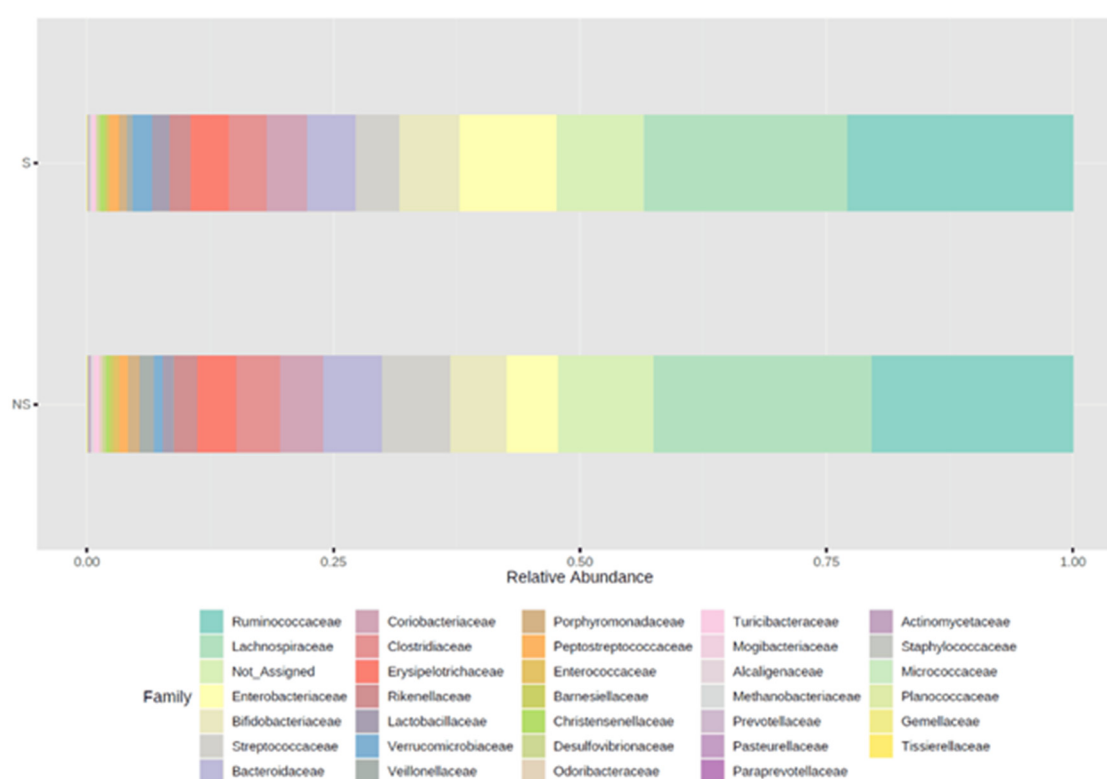

**Figure S1:** Distribution of bacterial families, expressed as relative abundance, in samples of sarcopenic (S) and not-sarcopenic (NS) subjects.

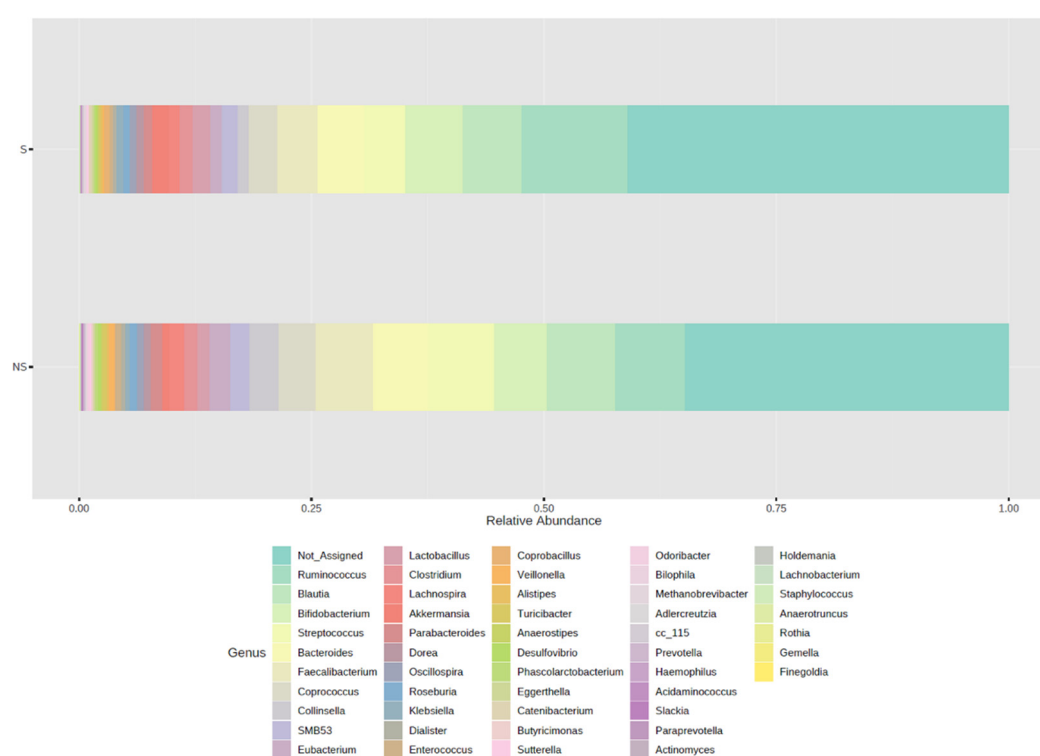

**Figure S2.** Distribution of bacterial genera, expressed as relative abundance, in samples of sarcopenic (S) and not sarcopenic (NS) subjects.

Table S1. Correlation between bacterial families and clinical and biochemical variables.

| Bacterial families           |   | Sarcopenia | Age (yrs) | BMI (kg/m <sup>2</sup> ) | eGFR (ml/m | CRP (mg/dl) | MIS    | diabetes | IS (umol/l) | PCs (umol IL-10 | Fetuin | IL-12p70 | TNF alpha IL-6 | IL-17  | MCP-1  | MDA umol/l |        |        |
|------------------------------|---|------------|-----------|--------------------------|------------|-------------|--------|----------|-------------|-----------------|--------|----------|----------------|--------|--------|------------|--------|--------|
| <i>Actinomycetaceae</i>      | r | -0.062     | 0.001     | 0.069                    | 0.092      | -0.148      | 0.055  | -0.027   | -0.030      | 0.175           | 0.106  | 0.045    | -0.398         | 0.096  | 0.149  | 0.288      | -0.137 | -0.108 |
|                              | p | 0.633      | 0.995     | 0.594                    | 0.478      | 0.251       | 0.673  | 0.837    | 0.817       | 0.181           | 0.412  | 0.735    | 0.001          | 0.460  | 0.248  | 0.027      | 0.289  | 0.408  |
| <i>Alcaligenaceae</i>        | r | 0.032      | -0.133    | -0.033                   | -0.068     | 0.162       | 0.144  | 0.164    | 0.142       | 0.128           | -0.096 | 0.061    | -0.062         | 0.128  | 0.206  | 0.100      | -0.076 | 0.039  |
|                              | p | 0.806      | 0.306     | 0.798                    | 0.601      | 0.209       | 0.266  | 0.202    | 0.279       | 0.331           | 0.458  | 0.646    | 0.638          | 0.320  | 0.108  | 0.452      | 0.557  | 0.767  |
| <i>Bacteroidaceae</i>        | r | 0.034      | -0.031    | -0.196                   | -0.090     | 0.102       | 0.023  | 0.161    | -0.004      | -0.019          | -0.150 | -0.099   | 0.014          | 0.287  | 0.286  | 0.023      | -0.156 | 0.046  |
|                              | p | 0.795      | 0.813     | 0.127                    | 0.485      | 0.430       | 0.857  | 0.212    | 0.974       | 0.888           | 0.245  | 0.454    | 0.917          | 0.024  | 0.024  | 0.865      | 0.226  | 0.724  |
| <i>Barnesiellaceae</i>       | r | -0.194     | -0.020    | -0.162                   | -0.060     | 0.000       | 0.068  | -0.037   | -0.103      | -0.074          | -0.043 | -0.122   | 0.144          | 0.216  | 0.090  | -0.068     | -0.141 | 0.081  |
|                              | p | 0.132      | 0.881     | 0.210                    | 0.642      | 0.997       | 0.600  | 0.773    | 0.431       | 0.572           | 0.742  | 0.358    | 0.268          | 0.092  | 0.486  | 0.611      | 0.275  | 0.537  |
| <i>Bifidobacteriaceae</i>    | r | 0.069      | -0.170    | 0.138                    | 0.162      | 0.093       | 0.094  | 0.024    | -0.019      | -0.166          | 0.175  | 0.114    | 0.097          | 0.050  | 0.018  | -0.067     | 0.072  | -0.160 |
|                              | p | 0.591      | 0.190     | 0.285                    | 0.209      | 0.472       | 0.470  | 0.855    | 0.888       | 0.204           | 0.173  | 0.390    | 0.459          | 0.700  | 0.892  | 0.616      | 0.578  | 0.218  |
| <i>Christensenellaceae</i>   | r | 0.090      | -0.009    | -0.287                   | -0.278     | 0.004       | -0.030 | -0.211   | -0.052      | 0.264           | -0.047 | -0.091   | 0.065          | 0.048  | 0.026  | 0.021      | 0.060  | 0.063  |
|                              | p | 0.485      | 0.946     | 0.024                    | 0.029      | 0.977       | 0.816  | 0.100    | 0.695       | 0.042           | 0.716  | 0.495    | 0.618          | 0.710  | 0.844  | 0.877      | 0.644  | 0.631  |
| <i>Clostridiaceae</i>        | r | 0.044      | -0.218    | 0.049                    | -0.271     | 0.031       | -0.042 | -0.159   | 0.163       | 0.233           | 0.227  | -0.018   | 0.049          | 0.036  | 0.203  | -0.165     | 0.153  | 0.034  |
|                              | p | 0.736      | 0.092     | 0.706                    | 0.033      | 0.810       | 0.745  | 0.217    | 0.214       | 0.073           | 0.076  | 0.894    | 0.710          | 0.780  | 0.114  | 0.212      | 0.236  | 0.793  |
| <i>Coriobacteriaceae</i>     | r | -0.012     | -0.068    | 0.003                    | 0.159      | 0.245       | 0.164  | 0.037    | -0.001      | 0.054           | 0.098  | 0.085    | 0.206          | -0.098 | 0.020  | -0.105     | 0.099  | -0.027 |
|                              | p | 0.927      | 0.601     | 0.981                    | 0.218      | 0.055       | 0.203  | 0.778    | 0.995       | 0.681           | 0.448  | 0.521    | 0.111          | 0.447  | 0.876  | 0.431      | 0.446  | 0.834  |
| <i>Enterobacteriaceae</i>    | r | 0.191      | 0.020     | -0.156                   | -0.037     | -0.062      | 0.064  | -0.062   | -0.007      | 0.012           | -0.147 | -0.170   | -0.018         | -0.026 | -0.096 | -0.036     | 0.091  | 0.300  |
|                              | p | 0.138      | 0.877     | 0.225                    | 0.774      | 0.633       | 0.623  | 0.632    | 0.960       | 0.927           | 0.254  | 0.199    | 0.892          | 0.838  | 0.457  | 0.784      | 0.480  | 0.019  |
| <i>Enterococcaceae</i>       | r | -0.050     | -0.002    | 0.106                    | 0.205      | 0.191       | 0.180  | 0.204    | 0.203       | -0.081          | 0.093  | 0.109    | -0.190         | -0.030 | 0.083  | 0.111      | -0.143 | -0.028 |
|                              | p | 0.702      | 0.987     | 0.412                    | 0.110      | 0.136       | 0.162  | 0.112    | 0.120       | 0.536           | 0.471  | 0.411    | 0.142          | 0.819  | 0.522  | 0.401      | 0.266  | 0.829  |
| <i>Lactobacillaceae</i>      | r | -0.133     | 0.014     | 0.160                    | 0.231      | 0.156       | 0.102  | 0.121    | 0.415       | 0.022           | 0.004  | 0.182    | 0.034          | -0.155 | 0.041  | -0.132     | 0.208  | 0.096  |
|                              | p | 0.303      | 0.915     | 0.213                    | 0.071      | 0.225       | 0.429  | 0.351    | 0.001       | 0.868           | 0.978  | 0.169    | 0.797          | 0.230  | 0.752  | 0.320      | 0.104  | 0.464  |
| <i>Micrococcaceae</i>        | r | 0.075      | 0.075     | 0.082                    | 0.169      | -0.092      | 0.055  | 0.097    | 0.014       | -0.108          | -0.133 | -0.016   | -0.052         | -0.122 | -0.278 | -0.073     | -0.215 | -0.039 |
|                              | p | 0.564      | 0.568     | 0.528                    | 0.190      | 0.477       | 0.674  | 0.455    | 0.914       | 0.413           | 0.304  | 0.905    | 0.688          | 0.347  | 0.029  | 0.581      | 0.094  | 0.767  |
| <i>Paraprevotellaceae</i>    | r | 0.042      | -0.092    | 0.060                    | 0.056      | 0.161       | 0.222  | 0.176    | -0.004      | -0.016          | 0.128  | 0.056    | 0.018          | 0.088  | 0.364  | -0.060     | 0.110  | 0.199  |
|                              | p | 0.744      | 0.480     | 0.641                    | 0.664      | 0.212       | 0.083  | 0.172    | 0.975       | 0.904           | 0.320  | 0.673    | 0.889          | 0.499  | 0.004  | 0.652      | 0.395  | 0.124  |
| <i>Pasteurellaceae</i>       | r | 0.099      | 0.090     | 0.123                    | -0.094     | 0.190       | 0.054  | -0.124   | 0.006       | -0.043          | 0.051  | -0.333   | 0.106          | -0.161 | -0.077 | -0.184     | 0.055  | 0.074  |
|                              | p | 0.442      | 0.493     | 0.790                    | 0.468      | 0.138       | 0.679  | 0.335    | 0.965       | 0.746           | 0.693  | 0.010    | 0.418          | 0.211  | 0.553  | 0.163      | 0.670  | 0.573  |
| <i>Peptostreptococcaceae</i> | r | 0.076      | -0.067    | -0.001                   | -0.161     | 0.093       | -0.026 | -0.111   | 0.087       | 0.108           | 0.236  | -0.099   | -0.023         | -0.120 | 0.033  | -0.275     | 0.154  | -0.096 |
|                              | p | 0.555      | 0.608     | 0.994                    | 0.212      | 0.471       | 0.839  | 0.393    | 0.509       | 0.413           | 0.064  | 0.457    | 0.861          | 0.353  | 0.796  | 0.035      | 0.233  | 0.464  |
| <i>Porphyromonadaceae</i>    | r | 0.009      | -0.072    | -0.231                   | -0.105     | 0.016       | 0.019  | -0.016   | 0.049       | 0.122           | -0.046 | -0.187   | 0.126          | 0.071  | 0.184  | 0.006      | -0.057 | -0.019 |
|                              | p | 0.945      | 0.582     | 0.071                    | 0.415      | 0.900       | 0.881  | 0.905    | 0.711       | 0.352           | 0.721  | 0.155    | 0.331          | 0.584  | 0.152  | 0.965      | 0.657  | 0.885  |
| <i>Prevotellaceae</i>        | r | -0.060     | 0.045     | -0.088                   | -0.283     | 0.137       | -0.054 | -0.143   | 0.058       | 0.191           | 0.155  | 0.049    | 0.054          | -0.152 | -0.035 | -0.164     | 0.289  | -0.003 |
|                              | p | 0.645      | 0.731     | 0.496                    | 0.026      | 0.288       | 0.675  | 0.269    | 0.658       | 0.143           | 0.229  | 0.710    | 0.677          | 0.238  | 0.786  | 0.214      | 0.023  | 0.979  |
| <i>Rikenellaceae</i>         | r | 0.073      | 0.031     | -0.344                   | -0.169     | 0.123       | 0.087  | 0.022    | -0.028      | 0.121           | -0.152 | 0.007    | 0.051          | 0.152  | 0.191  | 0.067      | -0.015 | 0.151  |
|                              | p | 0.570      | 0.815     | 0.006                    | 0.189      | 0.342       | 0.504  | 0.866    | 0.833       | 0.357           | 0.238  | 0.960    | 0.695          | 0.238  | 0.136  | 0.611      | 0.905  | 0.245  |
| <i>Staphylococcaceae</i>     | r | 0.072      | -0.115    | 0.051                    | 0.110      | -0.282      | -0.089 | 0.109    | 0.181       | 0.164           | -0.035 | 0.016    | -0.091         | -0.194 | -0.182 | 0.114      | -0.117 | -0.207 |
|                              | p | 0.579      | 0.376     | 0.694                    | 0.395      | 0.026       | 0.493  | 0.398    | 0.165       | 0.210           | 0.788  | 0.907    | 0.488          | 0.131  | 0.156  | 0.391      | 0.363  | 0.109  |
| <i>Streptococcaceae</i>      | r | -0.008     | -0.021    | -0.027                   | 0.229      | -0.126      | -0.028 | 0.241    | 0.141       | -0.007          | 0.059  | 0.192    | -0.179         | -0.049 | 0.022  | 0.066      | -0.168 | -0.296 |
|                              | p | 0.951      | 0.871     | 0.837                    | 0.073      | 0.328       | 0.828  | 0.059    | 0.283       | 0.959           | 0.650  | 0.145    | 0.168          | 0.706  | 0.864  | 0.621      | 0.193  | 0.021  |
| <i>Turicibacteraceae</i>     | r | -0.080     | -0.034    | -0.048                   | -0.178     | 0.017       | -0.102 | -0.235   | -0.041      | -0.100          | 0.037  | 0.062    | 0.151          | 0.048  | -0.012 | -0.197     | 0.097  | -0.102 |
|                              | p | 0.534      | 0.794     | 0.711                    | 0.167      | 0.893       | 0.430  | 0.066    | 0.754       | 0.447           | 0.773  | 0.642    | 0.247          | 0.714  | 0.925  | 0.135      | 0.452  | 0.434  |
| <i>Veillonellaceae</i>       | r | -0.208     | -0.138    | 0.259                    | 0.184      | 0.093       | 0.058  | -0.033   | -0.028      | -0.213          | 0.124  | -0.047   | -0.054         | -0.064 | 0.088  | -0.010     | -0.071 | -0.007 |
|                              | p | 0.104      | 0.289     | 0.042                    | 0.153      | 0.470       | 0.656  | 0.800    | 0.834       | 0.102           | 0.339  | 0.724    | 0.677          | 0.623  | 0.498  | 0.942      | 0.585  | 0.955  |
| <i>Verrucomicrobiaceae</i>   | r | 0.230      | 0.069     | -0.291                   | -0.085     | -0.271      | 0.032  | 0.005    | -0.074      | 0.152           | -0.069 | -0.008   | -0.041         | -0.084 | -0.098 | -0.045     | 0.029  | 0.117  |
|                              | p | 0.072      | 0.598     | 0.022                    | 0.513      | 0.033       | 0.807  | 0.972    | 0.575       | 0.247           | 0.592  | 0.950    | 0.755          | 0.518  | 0.447  | 0.734      | 0.825  | 0.370  |

BMI, Body Mass Index; eGFR, estimated Glomerular Filtration rate; PCs, p-cresyl sulfate; IS, indoxyl sulfate; CRP, C-reactive protein; IL, interleukin; TNF $\alpha$ , Tumor necrosis factor alpha; MCP-1, Monocyte Chemoattractant Protein-1; MDA, malondialdehyde.

Table S2. Correlation between genus and clinical and biochemical variables.

| Genus                   |   | Sarcopenia | Age (yrs) | BMI (kg/m <sup>2</sup> ) | eGFR (ml) | CRP (mg) | MIS    | diabetes | IS (umol/l) | PCs (umol/l) | IL-10  | Fetuin | IL-12p70 | TNF alpha | IL-6   | IL-17  | MCP-1  | MDA umol/l |
|-------------------------|---|------------|-----------|--------------------------|-----------|----------|--------|----------|-------------|--------------|--------|--------|----------|-----------|--------|--------|--------|------------|
| <i>Actinomyces</i>      | r | -0.062     | 0.001     | 0.069                    | 0.092     | -0.148   | 0.055  | -0.027   | -0.030      | 0.175        | 0.106  | 0.045  | -0.398   | 0.096     | 0.149  | 0.288  | -0.137 | -0.108     |
|                         | p | 0.633      | 0.995     | 0.594                    | 0.478     | 0.251    | 0.673  | 0.837    | 0.817       | 0.181        | 0.412  | 0.735  | 0.001    | 0.460     | 0.248  | 0.027  | 0.289  | 0.408      |
| <i>Akkermansia</i>      | r | 0.230      | 0.069     | -0.291                   | -0.085    | -0.271   | 0.032  | 0.005    | -0.074      | 0.152        | -0.069 | -0.008 | -0.041   | -0.084    | -0.098 | -0.045 | 0.029  | 0.117      |
|                         | p | 0.072      | 0.598     | 0.022                    | 0.513     | 0.033    | 0.807  | 0.972    | 0.575       | 0.247        | 0.592  | 0.950  | 0.755    | 0.518     | 0.447  | 0.734  | 0.825  | 0.370      |
| <i>Alistipes</i>        | r | 0.139      | 0.159     | -0.160                   | -0.054    | 0.113    | 0.155  | 0.274    | -0.018      | 0.095        | -0.065 | 0.036  | -0.096   | 0.082     | -0.014 | -0.025 | -0.060 | 0.086      |
|                         | p | 0.281      | 0.220     | 0.215                    | 0.680     | 0.383    | 0.230  | 0.031    | 0.888       | 0.472        | 0.614  | 0.785  | 0.464    | 0.527     | 0.913  | 0.852  | 0.643  | 0.511      |
| <i>Blautia</i>          | r | 0.004      | 0.019     | 0.178                    | 0.040     | -0.118   | -0.063 | 0.035    | -0.091      | -0.258       | -0.112 | -0.111 | -0.012   | -0.072    | -0.098 | 0.141  | -0.126 | -0.075     |
|                         | p | 0.976      | 0.885     | 0.166                    | 0.759     | 0.363    | 0.628  | 0.789    | 0.487       | 0.047        | 0.385  | 0.401  | 0.930    | 0.578     | 0.446  | 0.288  | 0.328  | 0.567      |
| <i>Catenibacterium</i>  | r | -0.152     | 0.109     | 0.018                    | -0.189    | 0.034    | -0.130 | -0.237   | 0.111       | 0.279        | 0.063  | -0.134 | 0.104    | -0.044    | -0.185 | -0.197 | 0.235  | 0.004      |
|                         | p | 0.238      | 0.404     | 0.888                    | 0.142     | 0.795    | 0.315  | 0.064    | 0.400       | 0.031        | 0.627  | 0.313  | 0.424    | 0.735     | 0.150  | 0.135  | 0.065  | 0.974      |
| <i>Clostridium</i>      | r | 0.062      | -0.094    | 0.069                    | -0.199    | -0.121   | -0.097 | -0.105   | 0.081       | 0.089        | 0.201  | -0.112 | -0.080   | -0.021    | 0.090  | -0.239 | 0.172  | -0.037     |
|                         | p | 0.635      | 0.473     | 0.596                    | 0.122     | 0.348    | 0.454  | 0.417    | 0.537       | 0.501        | 0.118  | 0.397  | 0.540    | 0.869     | 0.488  | 0.069  | 0.182  | 0.778      |
| <i>Collinsella</i>      | r | -0.141     | -0.123    | 0.067                    | 0.199     | 0.198    | 0.052  | 0.051    | 0.044       | -0.031       | 0.159  | -0.003 | 0.209    | -0.108    | -0.006 | -0.181 | 0.144  | 0.056      |
|                         | p | 0.274      | 0.346     | 0.604                    | 0.121     | 0.123    | 0.690  | 0.693    | 0.737       | 0.813        | 0.216  | 0.980  | 0.106    | 0.406     | 0.966  | 0.171  | 0.265  | 0.670      |
| <i>Coprobacillus</i>    | r | 0.108      | -0.107    | 0.008                    | 0.129     | 0.033    | 0.297  | 0.123    | 0.092       | -0.057       | 0.161  | 0.189  | 0.060    | -0.162    | -0.048 | 0.046  | -0.050 | -0.043     |
|                         | p | 0.402      | 0.413     | 0.954                    | 0.319     | 0.799    | 0.019  | 0.340    | 0.485       | 0.664        | 0.211  | 0.152  | 0.648    | 0.209     | 0.710  | 0.729  | 0.698  | 0.743      |
| <i>Desulfovibrio</i>    | r | -0.024     | 0.003     | 0.069                    | -0.036    | -0.165   | -0.223 | -0.061   | 0.193       | 0.139        | 0.173  | 0.015  | 0.095    | -0.150    | -0.118 | -0.066 | 0.263  | 0.124      |
|                         | p | 0.854      | 0.984     | 0.594                    | 0.781     | 0.200    | 0.081  | 0.637    | 0.140       | 0.291        | 0.178  | 0.909  | 0.468    | 0.244     | 0.359  | 0.617  | 0.039  | 0.340      |
| <i>Dialister</i>        | r | 0.017      | -0.124    | 0.050                    | -0.090    | 0.067    | 0.079  | -0.033   | -0.166      | -0.039       | 0.047  | -0.259 | 0.054    | 0.064     | 0.063  | -0.149 | 0.084  | -0.004     |
|                         | p | 0.896      | 0.339     | 0.697                    | 0.488     | 0.605    | 0.540  | 0.800    | 0.205       | 0.770        | 0.718  | 0.048  | 0.680    | 0.621     | 0.629  | 0.260  | 0.516  | 0.975      |
| <i>Dorea</i>            | r | -0.089     | 0.105     | -0.004                   | -0.172    | -0.037   | 0.226  | 0.104    | 0.215       | 0.288        | 0.028  | -0.067 | 0.026    | -0.082    | 0.061  | -0.286 | 0.248  | -0.076     |
|                         | p | 0.490      | 0.421     | 0.978                    | 0.182     | 0.773    | 0.078  | 0.421    | 0.098       | 0.026        | 0.832  | 0.614  | 0.844    | 0.528     | 0.635  | 0.028  | 0.052  | 0.559      |
| <i>Eggerthella</i>      | r | 0.177      | 0.219     | 0.011                    | -0.017    | 0.185    | 0.261  | 0.159    | -0.060      | -0.125       | -0.190 | 0.011  | -0.091   | 0.172     | 0.101  | 0.174  | -0.188 | -0.035     |
|                         | p | 0.169      | 0.090     | 0.935                    | 0.898     | 0.151    | 0.040  | 0.217    | 0.651       | 0.341        | 0.140  | 0.932  | 0.488    | 0.183     | 0.437  | 0.188  | 0.144  | 0.788      |
| <i>Enterococcus</i>     | r | -0.050     | -0.002    | 0.106                    | 0.205     | 0.191    | 0.180  | 0.204    | 0.203       | -0.081       | 0.093  | 0.109  | -0.190   | -0.030    | 0.083  | 0.111  | -0.143 | -0.028     |
|                         | p | 0.702      | 0.987     | 0.412                    | 0.110     | 0.136    | 0.162  | 0.112    | 0.120       | 0.536        | 0.471  | 0.411  | 0.142    | 0.819     | 0.522  | 0.401  | 0.266  | 0.829      |
| <i>Faecalibacterium</i> | r | -0.026     | -0.224    | 0.190                    | -0.134    | 0.055    | -0.065 | -0.099   | -0.003      | -0.064       | 0.032  | -0.087 | 0.162    | 0.045     | 0.060  | -0.003 | 0.030  | 0.125      |
|                         | p | 0.842      | 0.083     | 0.139                    | 0.299     | 0.674    | 0.617  | 0.446    | 0.984       | 0.627        | 0.805  | 0.512  | 0.213    | 0.726     | 0.641  | 0.980  | 0.818  | 0.338      |
| <i>Lachnobacterium</i>  | r | -0.078     | 0.098     | 0.091                    | -0.032    | 0.152    | 0.139  | 0.039    | -0.198      | -0.203       | -0.002 | -0.204 | 0.116    | 0.092     | 0.041  | -0.014 | -0.073 | -0.013     |
|                         | p | 0.549      | 0.454     | 0.482                    | 0.803     | 0.237    | 0.281  | 0.761    | 0.130       | 0.120        | 0.985  | 0.121  | 0.373    | 0.477     | 0.751  | 0.914  | 0.575  | 0.921      |
| <i>Lactobacillus</i>    | r | -0.133     | 0.014     | 0.160                    | 0.231     | 0.156    | 0.102  | 0.121    | 0.415       | 0.022        | 0.004  | 0.182  | 0.034    | -0.155    | 0.041  | -0.132 | 0.208  | 0.096      |
|                         | p | 0.303      | 0.915     | 0.213                    | 0.071     | 0.225    | 0.429  | 0.351    | 0.001       | 0.868        | 0.978  | 0.169  | 0.797    | 0.230     | 0.752  | 0.320  | 0.104  | 0.464      |
| <i>Oscillospira</i>     | r | 0.004      | -0.019    | -0.214                   | -0.071    | -0.004   | 0.184  | 0.226    | 0.016       | 0.223        | 0.075  | 0.045  | -0.052   | -0.113    | 0.071  | 0.042  | 0.073  | -0.021     |
|                         | p | 0.976      | 0.885     | 0.095                    | 0.585     | 0.974    | 0.152  | 0.077    | 0.904       | 0.087        | 0.560  | 0.736  | 0.693    | 0.380     | 0.585  | 0.752  | 0.571  | 0.870      |
| <i>Paraprevotella</i>   | r | 0.042      | -0.092    | 0.060                    | 0.056     | 0.161    | 0.222  | 0.176    | -0.004      | -0.016       | 0.128  | 0.056  | 0.018    | 0.088     | 0.364  | -0.060 | 0.110  | 0.199      |
|                         | p | 0.744      | 0.480     | 0.641                    | 0.664     | 0.212    | 0.083  | 0.172    | 0.975       | 0.904        | 0.320  | 0.673  | 0.889    | 0.499     | 0.004  | 0.652  | 0.395  | 0.124      |
| <i>Prevotella</i>       | r | -0.060     | 0.045     | -0.088                   | -0.283    | 0.137    | -0.054 | -0.143   | 0.058       | 0.191        | 0.155  | 0.049  | 0.054    | -0.152    | -0.035 | -0.164 | 0.289  | -0.003     |
|                         | p | 0.645      | 0.731     | 0.496                    | 0.026     | 0.288    | 0.675  | 0.269    | 0.658       | 0.143        | 0.229  | 0.710  | 0.677    | 0.238     | 0.786  | 0.214  | 0.023  | 0.979      |
| <i>Ruminococcus</i>     | r | 0.091      | -0.133    | -0.149                   | -0.143    | -0.081   | -0.075 | 0.106    | -0.076      | 0.196        | 0.023  | -0.002 | -0.252   | -0.008    | 0.063  | -0.031 | -0.227 | 0.078      |
|                         | p | 0.480      | 0.305     | 0.247                    | 0.269     | 0.531    | 0.562  | 0.413    | 0.562       | 0.133        | 0.858  | 0.985  | 0.050    | 0.949     | 0.625  | 0.814  | 0.076  | 0.552      |
| <i>SMB53</i>            | r | -0.016     | -0.248    | 0.164                    | -0.215    | 0.054    | -0.078 | -0.089   | 0.131       | 0.145        | 0.253  | -0.111 | 0.049    | -0.063    | 0.129  | -0.209 | 0.146  | 0.091      |
|                         | p | 0.902      | 0.054     | 0.203                    | 0.093     | 0.679    | 0.548  | 0.489    | 0.318       | 0.268        | 0.048  | 0.403  | 0.707    | 0.624     | 0.317  | 0.111  | 0.259  | 0.487      |
| <i>Streptococcus</i>    | r | -0.008     | -0.021    | -0.027                   | 0.229     | -0.126   | -0.028 | 0.241    | 0.141       | -0.007       | 0.059  | 0.192  | -0.179   | -0.049    | 0.022  | 0.066  | -0.168 | -0.296     |
|                         | p | 0.951      | 0.871     | 0.837                    | 0.073     | 0.328    | 0.828  | 0.059    | 0.283       | 0.959        | 0.650  | 0.145  | 0.168    | 0.706     | 0.864  | 0.621  | 0.193  | 0.021      |
| <i>Sutterella</i>       | r | 0.032      | -0.133    | -0.033                   | -0.068    | 0.162    | 0.144  | 0.164    | 0.142       | 0.128        | -0.096 | 0.061  | -0.062   | 0.128     | 0.206  | 0.100  | -0.076 | 0.039      |
|                         | p | 0.806      | 0.306     | 0.798                    | 0.601     | 0.209    | 0.266  | 0.202    | 0.279       | 0.331        | 0.458  | 0.646  | 0.638    | 0.320     | 0.108  | 0.452  | 0.557  | 0.767      |
| <i>Turicibacter</i>     | r | -0.080     | -0.034    | -0.048                   | -0.178    | 0.017    | -0.102 | -0.235   | -0.041      | -0.100       | 0.037  | 0.062  | 0.151    | 0.048     | -0.012 | -0.197 | 0.097  | -0.102     |
|                         | p | 0.534      | 0.794     | 0.711                    | 0.167     | 0.893    | 0.430  | 0.066    | 0.754       | 0.447        | 0.773  | 0.642  | 0.247    | 0.714     | 0.925  | 0.135  | 0.452  | 0.434      |

BMI, Body Mass Index; eGFR, estimated Glomerular Filtration rate; PCs, p-cresyl sulfate; IS, indoxyl sulfate; CRP, C-reactive protein; IL, interleukin; TNF $\alpha$ , Tumor necrosis factor alpha; MCP-1, Monocyte Chemoattractant Protein-1; MDA, malondialdehyde.
